# Supplementary material
Source: PubMed Central journal article supplement (PMC6354310)
Supplement: Supplemental_Material1.pdf [file Supplemental_Material1.pdf]

**Supplementary Table S1.** Percent of participants who supported each of the recommended outcome domains as 'critically important' (i.e. scores 7-9). For each of the three e-Delphi surveys (round 3) percents are reported in the order: healthcare users, healthcare practitioners, clinical researchers, commercial representatives and funders. \*Was excluded at this point because 15% of researchers scored 1-3 (15.4% 1-3, 84.6% 7-9), rating the outcome not important or critical. \*\*Was brought into the consensus meeting discussion, at the request of the participants.

| <b>Sound (percent of stakeholders with supporting opinions)</b> | <b>Psychology (percent of stakeholders with supporting opinions)</b> | <b>Pharmacology (percent of stakeholders with supporting opinions)</b> |
|-----------------------------------------------------------------|----------------------------------------------------------------------|------------------------------------------------------------------------|
| Ability to ignore (98,97,94,95)                                 | Ability to ignore (98,98,86)                                         | Ability to ignore (97,95,92,92)                                        |
| Ability to relax (86,86,82,95)                                  | Ability to relax (92,84,56)                                          | Ability to relax (88,46,62,58)                                         |
| Acceptance of tinnitus (94,97,77,95)                            | Acceptance of tinnitus (94,100,92)                                   | Acceptance of tinnitus (83,95,85,58)                                   |
| Adverse reaction (66,75,100,95)                                 | Adverse reaction (65,68,83)                                          | Adverse reaction (85,92,85,83)                                         |
| Annoyance (87,98,91,95)                                         | Annoyance (93,96,89)                                                 | Annoyance (85,84,77,92)                                                |
| Anxiety (78,91,88,84)                                           | Anxiety (80,96,97)                                                   | Anxiety (81,87,92,75)                                                  |
| Catastrophizing (55,81,24,68)                                   | Catastrophizing (76,96,78)                                           | Catastrophizing (61,87,62,33)                                          |
| Concentration (97,97,82,95)                                     | Concentration (99,92,86)                                             | Concentration (90,89,92,100)                                           |
| Conversations (87,90,71,95)                                     | Conversations (89,46,56)                                             | Conversations (83,41,77,75)                                            |
| Confusion (91,81,47,79)                                         | Confusion (89,80,56)                                                 | Confusion (88,81,92,83)                                                |
| Coping (94,98,94,95)                                            | Coping (98,98,86)                                                    | Coping (83,92,92,75)                                                   |
| Depressive symptoms (79,93,82,74)                               | Depressive symptoms (88,96,92)                                       | Depressive symptoms (81,92,92,75)                                      |
| Difficulties getting to sleep (86,97,85,90)                     | Difficulties getting to sleep (92,96,94)                             | Difficulties getting to sleep (85,92,100,100)                          |
| Fear (82,88,56,74)                                              | Fear (89,96,89)                                                      | Fear (85,70,85,67)                                                     |
| Frequency of occurrence of tinnitus episodes (92,74,74,95)      |                                                                      | Frequency of occurrence of tinnitus episodes (93,68,69,83)             |
| Helplessness (lack of control) (86,97,74,79)                    | Helplessness (lack of control) (93,100,86)                           | Helplessness (lack of control) (81,76,54,83)                           |
| Impact on individual activities (89,97,79,95)                   | Impact on individual activities (91,96,86)                           | Impact on individual activities (93,89,85,100)                         |
| Impact on relationships (81,90,68,74)                           | Impact on relationships (90,92,83)                                   | Impact on relationships (88,81,69,75)                                  |
| Impact on social life (82,97,77,84)                             | Impact on social life (91,92,83)                                     | Impact on social life (90,92,77,92)                                    |
| Impact on work (83,93,79,84)                                    | Impact on work (88,90,81)                                            | Impact on work (88,92,77,92)                                           |
| Irritable (73,88,68,63)                                         | Irritable (84,80,75)                                                 | Irritable (81,68,62,75)                                                |

|                                            |                                      |                                             |
|--------------------------------------------|--------------------------------------|---------------------------------------------|
| Listening (82,86,71,90)                    | Listening (91,42,44)                 | Listening (83,41,77,75)                     |
| Mood (70,84,62,74)                         | Mood (81,88,81)                      | Mood (76,60,92,33)                          |
| Negative thoughts/beliefs (86,86,44,95)    | Negative thoughts/beliefs (86,96,89) | Negative thoughts/beliefs (76,78,77,25)     |
| Quality of sleep (92,91,74,84)             | Quality of sleep (90,90,78)          | Quality of sleep (93,89,100,100)            |
| Sense of control (86,88,65,95)**           | Sense of control (89,96,72)          | Sense of control (85, 35, 54, 67)           |
| Suicidal thoughts (70, 86, 44, 84)         | Suicidal thoughts (76,92,83)         | Suicidal thoughts (66, 97, 92, 58)          |
| Tinnitus awareness (97,83,97,95)           | Tinnitus awareness (94, 40, 56)      | Tinnitus awareness (93, 41, 77, 100)        |
| Tinnitus intrusiveness (97,97,97,95)       | Tinnitus intrusiveness (96,92,86)    | Tinnitus intrusiveness (95,87, 85,92))      |
| Tinnitus loudness (97, 67, 88, 95)         | Tinnitus loudness (96, 46, 44)       | Tinnitus loudness (95,76,92,100)            |
| Tinnitus-related thoughts (87, 93, 62, 95) | Tinnitus-related thoughts (88,98,94) | Tinnitus-related thoughts (81, 81, 85, 92)* |
| Tinnitus unpleasantness (91,79,85,90)      | Tinnitus unpleasantness (91, 79, 85) | Tinnitus unpleasantness (93,89,85,100)      |
| Treatment satisfaction (84,90,97,90)       | Treatment satisfaction (82, 82, 67)  | Treatment satisfaction (88,87,77,100)       |
| Worries/concerns (72, 81, 68, 84)          | Worries/concerns (72,84,72)          | Worries/concerns (68, 65, 54, 50)           |
