# Supplementary material
Source: PubMed Central journal article supplement (PMC6354310)
Supplement: Supplemental_Material2.pdf [file Supplemental_Material2.pdf]

**Table S2.** Percent of dissenting voices scoring each of the recommended outcome domains as 'not important' (i.e. scores 1-3). For each of the three e-Delphi surveys (round 3) percents are reported in the order: healthcare users, healthcare practitioners, clinical researchers, commercial representatives and funders.

| <b>Sound (percent of stakeholders with dissenting opinions)</b>                                                                                 | <b>Psychology (percent of stakeholders with dissenting opinions)</b>                                                                                                                                 | <b>Pharmacology (percent of stakeholders with dissenting opinions)</b>                                                                             |
|-------------------------------------------------------------------------------------------------------------------------------------------------|------------------------------------------------------------------------------------------------------------------------------------------------------------------------------------------------------|----------------------------------------------------------------------------------------------------------------------------------------------------|
| Ability to ignore (0,0,0,0)<br>Ability to relax (1,0,6,5)<br>Acceptance of tinnitus (0,2,3,6)                                                   | Ability to ignore (1,0,3)<br><br>Acceptance of tinnitus (2,0,6)                                                                                                                                      | Ability to ignore (2,0,0,0)<br><br>Adverse reaction (2,0,0,0)<br>Annoyance (7,0,0,0)<br>Anxiety (5,0,8,0)                                          |
| Annoyance (1,0,0,0)<br>Anxiety (3,0,3,5)                                                                                                        | Annoyance (1,0,0)<br>Anxiety (5,0,0)<br>Catastrophizing (6,0,8)<br>Concentration (0,0,0)                                                                                                             | Concentration (0,0,8,0)<br><br>Confusion (5,0,8,0)<br>Coping (5,0,8,0)<br>Depressive symptoms (5,0,8,0)<br>Difficulties getting to sleep (5,0,0,0) |
| Concentration (0,0,0,5)<br>Conversations (0,4,0,0)                                                                                              | Coping (0,0,6)<br>Depressive symptoms (2,0,0)<br>Difficulties getting to sleep (6,0,0)<br>Fear (3,0,3)                                                                                               |                                                                                                                                                    |
| Coping (0,2,0,5)<br>Depressive symptoms (5,2,6,5)<br>Difficulties getting to sleep (4,2,0,5)                                                    | Helplessness (lack of control) (2,0,3)<br>Impact on individual activities (2,0,0)<br>Impact on relationships (2,0,3)<br>Impact on social life (2,0,3)<br>Impact on work (3,0,0)<br>Irritable (3,0,6) | Impact on individual activities (5,0,0,0)<br><br>Impact on social life (5,0,0,0)<br>Impact on work (2,0,0,0)                                       |
| Frequency of occurrence of tinnitus episodes (1,2,3,0)<br>Helplessness (lack of control) (4,0,3,0)<br>Impact on individual activities (2,4,6,6) | Mood (1,2,8)<br>Negative thoughts/beliefs (3,0,6)<br>Quality of sleep (3,2,0)                                                                                                                        |                                                                                                                                                    |
| Impact on social life (4,0,3,6)<br>Impact on work (3,0,0,5)                                                                                     |                                                                                                                                                                                                      |                                                                                                                                                    |
| Listening (1,2,0,6)                                                                                                                             |                                                                                                                                                                                                      |                                                                                                                                                    |
| Quality of sleep (1,2,3,5)                                                                                                                      |                                                                                                                                                                                                      | Quality of sleep (2,0,0,0)                                                                                                                         |

|                                   |                                   |                                   |
|-----------------------------------|-----------------------------------|-----------------------------------|
| Sense of control (2,0,3,0)        | Sense of control (2,0,3)          |                                   |
| Tinnitus awareness (0,4,0,0)      | Suicidal thoughts (14,0,0)        |                                   |
| Tinnitus intrusiveness (1,0,0,5)  | Tinnitus intrusiveness (2,0,0)    | Tinnitus intrusiveness (0,0,0,0)  |
|                                   | Tinnitus-related thoughts (1,0,0) | Tinnitus loudness (0,3,0,0)       |
| Tinnitus unpleasantness (1,0,3,0) |                                   | Tinnitus unpleasantness (0,0,8,0) |
| Treatment satisfaction (0,0,3,0)  | Worries/concerns (3,0,8)          | Treatment satisfaction (2,0,0,0)  |
